# Supplementary material for: Entomopathogenic Fungi Biodiversity in the Soil of Three Provinces Located in Southwest China and First Approach to Evaluate Their Biocontrol Potential
Source: MDPI journal article supplement (doi:10.3390/jof7110984), 2021-11-18
Supplement: s1 [file s1]

**Table S1.** Information of soil samples collection and fungal isolation.

| Sample NO. | Sample Location   | Longitude and Latitude | Soil Vegetation | Isolate NO | Species                             | Genebank Access NO. |
|------------|-------------------|------------------------|-----------------|------------|-------------------------------------|---------------------|
| SC01       | Wenchuan, Sichuan | E103.56,N31.46         | crop            | PlSC01A01  | <i>Purpureocillium lilacinum</i>    | 1. MW113258         |
|            |                   |                        |                 | BbSC01A02  | <i>Beauveria bassiana</i>           | 2. MW113259         |
|            |                   |                        | Grassy          | PlSC01B01  | <i>Purpureocillium lilacinum</i>    | 3. MW113260         |
|            |                   |                        |                 | PpSC01B02  | <i>Pseudogymnoascus pannorum</i>    | 4. MW113261         |
|            |                   |                        |                 | McSC01B03  | <i>Metarhizium flavoviride</i>      | 5. MW113262         |
| SC02       | Maoxian, Sichuan  | E103.85,N31.73         | Grassy          | PlSC02A01  | <i>Purpureocillium lilacinum</i>    | 6. MW113263         |
|            |                   |                        |                 | PpSC02A02  | <i>Pseudogymnoascus pannorum</i>    | 7. MW113264         |
|            |                   |                        |                 | MaSC02A03  | <i>Pseudogymnoascus pannorum</i>    | 8. MW113265         |
|            |                   |                        | orchard         | MmSC02B01  | <i>Metarhizium marquandii</i>       | 9. MW113266         |
|            |                   |                        |                 | MaSC02B02  | <i>Metarhizium anisopliae</i>       | 10. MW113267        |
|            |                   |                        |                 | PpSC02B03  | <i>Metarhizium anisopliae</i>       | 11. MW113268        |
| SC03       | Aba, Sichuan      | E103.73,N32.16         | Grassy          | MaSC03A02  | <i>Metarhizium anisopliae</i>       | 12. MW113269        |
|            |                   |                        | orchard         | PcSC03B01  | <i>Penicillium citrinum</i>         | 13. MW113270        |
| SC04       | Aba, Sichuan      | E103.52,N32.90         | Grassy          |            |                                     | 14.                 |
| SC05       | Aba, Sichuan      | E103.35,N32.96         | Grassy          | CcSC05A01  | <i>Cladosporium cladosporioides</i> | 15. MW113271        |
|            |                   |                        |                 | PcSC05A03  | <i>Penicillium citrinum</i>         | 16. MW113272        |
| SC06       | Ruoergai, Sichuan | E102.94,N33.85         | Grassy          | PpSC06A01  | <i>Pseudogymnoascus pannorum</i>    | 17. MW113273        |
|            |                   |                        |                 | PlSC06A02  | <i>Purpureocillium lavendulum</i>   | 18. MW113274        |
|            |                   |                        |                 | PpSC06B02  | <i>Pseudogymnoascus pannorum</i>    | 19. MW113275        |
|            |                   |                        |                 | MaSC06B03  | <i>Metarhizium anisopliae</i>       | 20. MW113276        |
| SC07       | Ruoergai, Sichuan | E102.75,N34.00         | Grassy          | MaSC07A01  | <i>Metarhizium anisopliae</i>       | 21. MW113277        |
|            |                   |                        |                 | PpSC07A02  | <i>Pseudogymnoascus pannorum</i>    | 22. MW113278        |
| SC08       | Ruoergai, Sichuan | E102.47,N33.53         | Grassy          | LcSC08A01  | <i>Lecanicillium coprophilum</i>    | 23. MW113279        |
|            |                   |                        |                 | PpSC08A02  | <i>Clonostachys rosea</i>           | 24. MW113280        |
| SC09       | Hongyuan, Sichuan | E102.47,N32.79         | Grassy          | BbSC09A01  | <i>Beauveria bassiana</i>           | 25. MW113281        |
|            |                   |                        |                 | MaSC09A02  | <i>Metarhizium anisopliae</i>       | 26. MW113282        |

| Sample NO. | Sample Location   | Longitude and Latitude | Soil Vegetation | Isolate NO | Species                            | Genebank Access NO. |
|------------|-------------------|------------------------|-----------------|------------|------------------------------------|---------------------|
|            |                   |                        |                 | PpSC09A03  | <i>Pseudogymnoascus pannorum</i>   | 27. MW113283        |
| SC10       | Barkam, Sichuan   | E102.11,N31.92         | crop            | PpSC10A01  | <i>Pseudogymnoascus pannorum</i>   | 28. MW113284        |
| SC11       | Barkam, Sichuan   | E102.04,N31.91         | forest          | AsSC11A01  | <i>Lasionectriopsis spinosa</i>    | 29. MW113285        |
|            |                   |                        |                 | PpSC11A02  | <i>Pseudogymnoascus pannorum</i>   | 30. MW113286        |
|            |                   |                        |                 | PcSC11A03  | <i>Penicillium citrinum</i>        | 31. MW113287        |
|            |                   |                        |                 | PlSC11A04  | <i>Purpureocillium lilacinum</i>   | 32. MW113288        |
| SC12       | Barkam, Sichuan   | E101.84,N31.84         | Grassy          | BbSC12A01  | <i>Beauveria bassiana</i>          | 33. MW113289        |
|            |                   |                        |                 | PpSC12A02  | <i>Pseudogymnoascus pannorum</i>   | 34. MW113290        |
|            |                   |                        |                 | CrSC12A03  | <i>Clonostachys rosea</i>          | 35. MW113291        |
|            |                   |                        |                 | CsSC12A04  | <i>Cladosporium sphaerospermum</i> | 36. MW113292        |
| SC13       | Rangtang, Sichuan | E101.01,N31.95         | Grassy          | SC13A02    | <i>Penicillium madriti</i>         | 37. MW113293        |
|            |                   |                        |                 | MmSC13A05  | <i>Metarhizium marquandii</i>      | 38. MW113294        |
| SC14       | Luhuo, Sichuan    | E100.71,N31.49         | Grassy crop     |            |                                    | 39. MW113295        |
|            |                   |                        | Arable          | PcSC14C01  | <i>Penicillium citrinum</i>        | 40. MW113296        |
|            |                   |                        |                 | PlSC14C02  | <i>Purpureocillium lilacinum</i>   | 41. MW113297        |
|            |                   |                        |                 | AsSC14C03  | <i>Aspergillus subramanianii</i>   | 42. MW113298        |
| SC15       | Luhuo, Sichuan    | E100.70,N31.38         | orchard         | PlSC15A01  | <i>Purpureocillium lilacinum</i>   | 43. MW113299        |
|            |                   |                        |                 | CrSC15A02  | <i>Clonostachys rosea</i>          | 44. MW113300        |
|            |                   |                        |                 | PpSC15A03  | <i>Pseudogymnoascus pannorum</i>   | 45. MW113301        |
|            |                   |                        |                 | MmSC15A04  | <i>Metarhizium marquandii</i>      | 46. MW113302        |
|            |                   |                        |                 | IfSC15A05  | <i>Isaria javanica</i>             | 47. MW113303        |
|            |                   |                        | Grassy          | MaSC15B01  | <i>Metarhizium anisopliae</i>      | 48. MW113304        |
|            |                   |                        |                 | PlSC15B02  | <i>Purpureocillium lavendulum</i>  | 49. MW113305        |
|            |                   |                        | crop            | MaSC15C01  | <i>Metarhizium anisopliae</i>      | 50. MW113306        |
|            |                   |                        |                 | PpSC15C02  | <i>Pseudogymnoascus pannorum</i>   | 51. MW113307        |
|            |                   |                        |                 | PlSC15C03  | <i>Purpureocillium lilacinum</i>   | 52. MW113308        |
| SC16       | Daofu, Sichuan    | E101.20,N30.92         | crop            | PlSC16A01  | <i>Purpureocillium lilacinum</i>   | 53. MW113309        |
|            |                   |                        |                 | MaSC16A02  | <i>Metarhizium anisopliae</i>      | 54. MW113310        |

| Sample NO. | Sample Location  | Longitude and Latitude | Soil Vegetation | Isolate NO | Species                             | Genebank Access NO. |
|------------|------------------|------------------------|-----------------|------------|-------------------------------------|---------------------|
| SC17       | Danba, Sichuan   | E101.62,N30.55         | crop            | McSC17A01  | <i>Metarhizium carneum</i>          | 56. MW113310        |
|            |                  |                        | Grassy          | PpSC17A02  | <i>Pseudogymnoascus pannorum</i>    | 57. MW113311        |
|            |                  |                        |                 | MaSC17A05  | <i>Metarhizium anisopliae</i>       | 58. MW113312        |
| SC18       | Danba, Sichuan   | E101.72,N30.60         | crop            | PlSC18A01  | <i>Purpureocillium lilacinum</i>    | 59. MW113313        |
|            |                  |                        |                 | PpSC18A03  | <i>Pseudogymnoascus pannorum</i>    | 60. MW113314        |
|            |                  |                        |                 | MmSC18A04  | <i>Metarhizium marquandii</i>       | 61. MW113315        |
|            |                  |                        |                 | MaSC18A05  | <i>Metarhizium anisopliae</i>       | 62. MW113316        |
|            |                  |                        | Grassy          | PpSC18B01  | <i>Pseudogymnoascus pannorum</i>    | 63. MW113317        |
|            |                  |                        |                 | BbSC18B02  | <i>Beauveria bassiana</i>           | 64. MW113318        |
|            |                  |                        |                 | McSC18B03  | <i>Metarhizium carneum</i>          | 65. MW113319        |
| SC19       | Danba, Sichuan   | E101.97,N30.94         | crop            | MaSC19A01  | <i>Metarhizium anisopliae</i>       | 66. MW113320        |
|            |                  |                        |                 | MmSC19A02  | <i>Metarhizium marquandii</i>       | 67. MW113321        |
|            |                  |                        | Grassy          | MmSC19B01  | <i>Metarhizium marquandii</i>       | 68. MW113322        |
|            |                  |                        |                 | MaSC19B03  | <i>Metarhizium anisopliae</i>       | 69. MW113323        |
|            |                  |                        |                 | CcSC19B04  | <i>Cladosporium cladosporioides</i> | 70. MW113324        |
|            |                  |                        |                 | PcSC19B05  | <i>Penicillium citrinum</i>         | 71. MW113325        |
|            |                  |                        |                 | SkSC19B07  | <i>Sarocladium kiliense</i>         | 72. MW113326        |
| SC20       | Xiaojin, Sichuan | E102.66,N30.97         | crop            | PcSC20A02  | <i>Penicillium citrinum</i>         | 73. MW113327        |
|            |                  |                        |                 | BbSC20A03  | <i>Beauveria bassiana</i>           | 74. MW113328        |
|            |                  |                        |                 | PpSC20A05  | <i>Pseudogymnoascus pannorum</i>    | 75. MW113329        |
|            |                  |                        |                 | SkSC20A06  | <i>Sarocladium kiliense</i>         | 76. MW113330        |
|            |                  |                        |                 | MmSC20A07  | <i>Metarhizium marquandii</i>       | 77. MW113331        |
|            |                  |                        |                 | PlSC20A08  | <i>Purpureocillium lavendulum</i>   | 78. MW113332        |
|            |                  |                        |                 |            |                                     | 79.                 |
| SC21       | Aba, Sichuan     | E102.52,N31.15         | forest          | PpSC20B02  | <i>Pseudogymnoascus pannorum</i>    | 80. MW113333        |
|            |                  |                        |                 | MmSC20B04  | <i>Metarhizium marquandii</i>       | 81. MW113334        |
|            |                  |                        |                 |            |                                     | 82. MW113335        |
| SC22       | Xiaojin, Sichuan | E102.41,N30.51         | Grassy          | PlSC21A01  | <i>Purpureocillium lilacinum</i>    | 83. MW113336        |
|            |                  |                        |                 | PcSC21A02  | <i>Penicillium citrinum</i>         | 84. MW113337        |

| Sample NO. | Sample Location   | Longitude and Latitude | Soil Vegetation | Isolate NO     | Species                          | Genebank Access NO. |
|------------|-------------------|------------------------|-----------------|----------------|----------------------------------|---------------------|
| SC23       | Ya'an, Sichuan    | E102.73,N30.77         | Grassy          | SsSC22A02      | <i>Simplicillium subtropicum</i> | 85. MW113338        |
|            |                   |                        |                 | PpSC22A03      | <i>Pseudogymnoascus pannorum</i> | 86. MW113339        |
|            |                   |                        |                 | BbSC23A01      | <i>Beauveria bassiana</i>        | 87. MW113340        |
|            |                   |                        |                 | PpSC23A02      | <i>Pseudogymnoascus pannorum</i> | 88. MW113341        |
|            |                   |                        |                 | MaSC23A03      | <i>Metarhizium anisopliae</i>    | 89. MW113342        |
| SC24       | Lushan, Sichuan   | E102.91,N30.11         | Grassy          | crop PpSC24A01 | <i>Pseudogymnoascus pannorum</i> | 90. MW113343        |
|            |                   |                        |                 | PmSC24A02      | <i>Penicillium manginii</i>      | 91. MW113344        |
|            |                   |                        |                 | MaSC24A03      | <i>Metarhizium anisopliae</i>    | 92. MW113345        |
|            |                   |                        |                 | MmSC24A04      | <i>Metarhizium marquandii</i>    | 93. MW113346        |
|            |                   |                        |                 | crop           |                                  | 94.                 |
| SC25       | Tianquan, Sichuan | E102.79,N30.02         | Arable          | PcSC25A01      | <i>Pochonia chlamydosporia</i>   | 95. MW113347        |
|            |                   |                        |                 | PpSC25A02      | <i>Pseudogymnoascus pannorum</i> | 96. MW113348        |
|            |                   |                        |                 | PcSC25A03      | <i>Penicillium citrinum</i>      | 97. MW113349        |
|            |                   |                        |                 | MaSC25A04      | <i>Metarhizium anisopliae</i>    | 98. MW113350        |
|            |                   |                        |                 | PlSC25A05      | <i>Purpureocillium lilacinum</i> | 99. MW113351        |
| SC26       | Luding, Sichuan   | E102.23,N29.96         | Grassy          | PlSC26A02      | <i>Purpureocillium lilacinum</i> | 100. MW113352       |
|            |                   |                        |                 | MaSC26A03      | <i>Metarhizium anisopliae</i>    | 101. MW113353       |
|            |                   |                        |                 | MmSC27A02      | <i>Metarhizium marquandii</i>    | 102. MW113354       |
| SC27       | Kangding, Sichuan | E101.95,N30.00         | forest          | MaSC27A03      | <i>Metarhizium anisopliae</i>    | 103. MW113355       |
|            |                   |                        |                 | PpSC27A04      | <i>Pseudogymnoascus pannorum</i> | 104. MW113356       |
|            |                   |                        |                 | PcSC27A06      | <i>Metapochonia bulbillosa</i>   | 105. MW113357       |
|            |                   |                        |                 | SsSC27A07      | <i>Simplicillium subtropicum</i> | 106. MW113358       |
|            |                   |                        |                 | SsSC27B01      | <i>Simplicillium subtropicum</i> | 107. MW113359       |
|            |                   |                        | Grassy          | PpSC27B03      | <i>Pseudogymnoascus pannorum</i> | 108. MW113360       |
|            |                   |                        |                 | PcSC27B04      | <i>Penicillium citrinum</i>      | 109. MW113361       |
|            |                   |                        |                 | McSC27B05      | <i>Metarhizium carneum</i>       | 110. MW113362       |
|            |                   |                        |                 | MaSC27B07      | <i>Metarhizium anisopliae</i>    | 111. MW113363       |
|            |                   |                        |                 | PlSC27C01      | <i>Purpureocillium lilacinum</i> | 112. MW113364       |
|            |                   |                        | crop            | SC27C03        | <i>Penicillium raperi</i>        | 113. MW113365       |

| Sample NO. | Sample Location   | Longitude and Latitude | Soil Vegetation | Isolate NO | Species                           | Genebank Access NO. |
|------------|-------------------|------------------------|-----------------|------------|-----------------------------------|---------------------|
| SC28       | Kangding, Sichuan | E101.63,N30.08         | Grassy          | CrSC27C04  | <i>Clonostachys rosea</i>         | 114. MW113366       |
|            |                   |                        |                 | SsSC27C05  | <i>Simplicillium subtropicum</i>  | 115. MW113367       |
|            |                   |                        | Arable          | PcSC27C07  | <i>Penicillium citrinum</i>       | 116. MW113368       |
|            |                   |                        |                 | PpSC27C08  | <i>Pseudogymnoascus pannorum</i>  | 117. MW113369       |
|            |                   |                        |                 | SC27D02    | <i>Penicillium raperi</i>         | 118. MW113370       |
|            |                   |                        |                 | PlSC27D03  | <i>Purpureocillium lilacinum</i>  | 119. MW113371       |
|            |                   |                        |                 | PpSC28A01  | <i>Pseudogymnoascus pannorum</i>  | 120. MW113372       |
|            |                   |                        |                 | PlSC28A02  | <i>Purpureocillium lilacinum</i>  | 121. MW113373       |
|            |                   |                        |                 | PcSC28A03  | <i>Penicillium citrinum</i>       | 122. MW113374       |
|            |                   |                        |                 | AtSC28A04  | <i>Aspergillus terreus</i>        | 123. MW113375       |
|            |                   |                        |                 | MaSC28A05  | <i>Metarhizium anisopliae</i>     | 124. MW113376       |
|            |                   |                        | Grassy          | PcSC28B01  | <i>Penicillium citrinum</i>       | 125. MW113377       |
|            |                   |                        |                 | PlSC28B02  | <i>Purpureocillium lavendulum</i> | 126. MW113378       |
|            |                   |                        |                 | SsSC28B03  | <i>Simplicillium subtropicum</i>  | 127. MW113379       |
|            |                   |                        |                 | CrSC28B04  | <i>Clonostachys rosea</i>         | 128. MW113380       |
| SC29       | Yajiang, Sichuan  | E100.66,N30.15         | Grassy          | PlSC29A01  | <i>Purpureocillium lilacinum</i>  | 129. MW113381       |
| SC30       | Litang, Sichuan   | E100.24,N29.99         | Grassy          | PcSC30A02  | <i>Penicillium citrinum</i>       | 130. MW113382       |
|            |                   |                        |                 | PlSC30A05  | <i>Purpureocillium lilacinum</i>  | 131. MW113383       |
| SC31       | Litang, Sichuan   | E099.88,N30.22         | Grassy          | PlSC31A02  | <i>Purpureocillium lilacinum</i>  | 132. MW113384       |
|            |                   |                        |                 | PjSC31A03  | <i>Penicillium janthinellum</i>   | 133. MW113385       |
| SC32       | Batang, Sichuan   | E099.41,N30.27         | crop            | PlSC32A01  | <i>Purpureocillium lavendulum</i> | 134. MW113386       |
|            |                   |                        |                 | SsSC32A02  | <i>Simplicillium subtropicum</i>  | 135. MW113387       |
|            |                   |                        |                 | MaSC32B01  | <i>Metarhizium anisopliae</i>     | 136. MW113388       |
|            |                   |                        | Grassy          | IfSC32B02  | <i>Isaria javanica</i>            | 137. MW113389       |
|            |                   |                        |                 | PcSC32C01  | <i>Penicillium citrinum</i>       | 138. MW113390       |
|            |                   |                        |                 | IfSC32C03  | <i>Isaria javanica</i>            | 139. MW113391       |
| SC33       | Batang, Sichuan   | E099.01,N29.27         | Grassy          | PlSC33A01  | <i>Purpureocillium lilacinum</i>  | 140. MW113392       |
|            |                   |                        |                 | AtSC33A02  | <i>Aspergillus terreus</i>        | 141. MW113393       |

| Sample NO. | Sample Location    | Longitude and Latitude | Soil Vegetation | Isolate NO | Species                             | Genebank Access NO. |
|------------|--------------------|------------------------|-----------------|------------|-------------------------------------|---------------------|
| SC34       | Ya'an, Sichuan     | E102.89,N29.81         | forest          | SkSC33A03  | <i>Sarocladium kiliense</i>         | 142. MW113394       |
|            |                    |                        |                 | PlSC33B01  | <i>Purpureocillium lilacinum</i>    | 143. MW113395       |
|            |                    |                        |                 | MaSC33B02  | <i>Purpureocillium lavendulum</i>   | 144. MW113396       |
|            |                    |                        |                 | CrSC33B03  | <i>Clonostachys rosea</i>           | 145. MW113397       |
|            |                    |                        |                 | MmSC33B04  | <i>Metarhizium marquandii</i>       | 146. MW113398       |
|            |                    |                        |                 | PcSC33B05  | <i>Penicillium citrinum</i>         | 147. MW113399       |
|            |                    |                        |                 | SsSC33B06  | <i>Simplicillium subtropicum</i>    | 148. MW113400       |
| SC35       | Longchang, Sichuan | E105.31,N29.32         | Grassy          | BbSC33B07  | <i>Beauveria bassiana</i>           | 149. MW113401       |
|            |                    |                        |                 | IfSC34A01  | <i>Isaria javanica</i>              | 150. MW113402       |
|            |                    |                        |                 | MaSC34A02  | <i>Metarhizium anisopliae</i>       | 151. MW113403       |
|            |                    |                        | crop            | MaSC34B02  | <i>Metarhizium anisopliae</i>       | 152. MW113404       |
|            |                    |                        |                 | MmSC34B03  | <i>Metarhizium marquandii</i>       | 153. MW113405       |
|            |                    |                        |                 | TtSC34B04  | <i>Talaromyces trachyspermus</i>    | 154. MW113406       |
|            |                    |                        |                 | IjSC35A03  | <i>Isaria javanica</i>              | 155. MW113407       |
| SC36       | Hejiang, Sichuan   | E105.88,N28.90         | Grassy          | MmSC35A04  | <i>Cladosporium cladosporioides</i> | 156. MW113408       |
|            |                    |                        | crop            | PlSC35B01  | <i>Purpureocillium lavendulum</i>   | 157. MW113409       |
|            |                    |                        |                 | SC35B02    | <i>Penicillium raperi</i>           | 158. MW113410       |
|            |                    |                        |                 | IfSC35B04  | <i>Isaria javanica</i>              | 159. MW113411       |
|            |                    |                        | orchard         | CcSC36A01  | <i>Cladosporium cladosporioides</i> | 160. MW113412       |
|            |                    |                        |                 | MaSC36A02  | <i>Metarhizium anisopliae</i>       | 161. MW113413       |
|            |                    |                        |                 | AtSC36A04  | <i>Aspergillus terreus</i>          | 162. MW113414       |
| SC37       | Changning, Sichuan | E105.02,N28.73         | crop            | SC36B02    | <i>Penicillium raperi</i>           | 163. MW113415       |
|            |                    |                        |                 | PlSC36B01  | <i>Purpureocillium lilacinum</i>    | 164. MW113416       |
|            |                    |                        |                 | PlSC36C01  | <i>Purpureocillium lilacinum</i>    | 165. MW113417       |
|            |                    |                        |                 | PpSC36C04  | <i>Purpureocillium lilacinum</i>    | 166. MW113418       |
|            |                    |                        |                 | MaSC36C06  | <i>Metarhizium anisopliae</i>       | 167. MW113419       |
|            |                    |                        |                 | PsSC36C07  | <i>Penicillium janthinellum</i>     | 168. MW113420       |
|            |                    |                        |                 | PlSC37A03  | <i>Purpureocillium lilacinum</i>    | 169. MW113421       |

| Sample NO. | Sample Location  | Longitude and Latitude           | Soil Vegetation   | Isolate NO      | Species                          | Genebank Access NO.               |                   |                                   |                   |
|------------|------------------|----------------------------------|-------------------|-----------------|----------------------------------|-----------------------------------|-------------------|-----------------------------------|-------------------|
| SC38       | Yibin, Sichuan   | E104.93,N28.83                   | forest            | PcSC37A04       | <i>Penicillium janthinellum</i>  | 170. MW11342<br>2                 |                   |                                   |                   |
|            |                  |                                  |                   | AtSC37A05       | <i>Aspergillus terreus</i>       | 171. MW11342<br>3                 |                   |                                   |                   |
|            |                  |                                  |                   | MmSC37A06       | <i>Metarhizium marquandii</i>    | 172. MW11342<br>4                 |                   |                                   |                   |
|            |                  |                                  |                   | SC37A08         | <i>Penicillium raperi</i>        | 173. MW11342<br>5                 |                   |                                   |                   |
|            |                  |                                  |                   | PcSC37B01       | <i>Penicillium citrinum</i>      | 174. MW11342<br>6                 |                   |                                   |                   |
|            |                  |                                  |                   | PjC37B02        | <i>Penicillium janthinellum</i>  | 175. MW11342<br>7                 |                   |                                   |                   |
|            |                  |                                  |                   | SC37B04         | <i>Penicillium raperi</i>        | 176. MW11342<br>8                 |                   |                                   |                   |
|            |                  |                                  |                   | PjSC37C01       | <i>Penicillium janthinellum</i>  | 177. MW11342<br>9                 |                   |                                   |                   |
|            |                  |                                  | Grassy            | PISC37C02       | <i>Purpureocillium lilacinum</i> | 178. MW11343<br>0                 |                   |                                   |                   |
|            |                  |                                  |                   | MmSC38A02       | <i>Metarhizium marquandii</i>    | 179. MW11343<br>1                 |                   |                                   |                   |
|            |                  |                                  |                   | orchard         | PISC38A03                        | <i>Purpureocillium lavendulum</i> | 180. MW11343<br>2 |                                   |                   |
|            |                  |                                  |                   |                 | PISC38B01                        | <i>Purpureocillium lilacinum</i>  | 181. MW11343<br>3 |                                   |                   |
|            |                  |                                  |                   |                 | MaSC38B03                        | <i>Metarhizium anisopliae</i>     | 182. MW11343<br>4 |                                   |                   |
|            |                  |                                  |                   |                 | PcSC38C01                        | <i>Penicillium citrinum</i>       | 183. MW11343<br>5 |                                   |                   |
|            |                  |                                  | SC39              | Xuzhou, Sichuan | E104.38,N28.93                   | Grassy                            | MaSC38C02         | <i>Metarhizium anisopliae</i>     | 184. MW11343<br>6 |
|            |                  |                                  |                   |                 |                                  |                                   | PISC38C03         | <i>Purpureocillium lavendulum</i> | 185. MW11343<br>7 |
|            |                  |                                  |                   |                 |                                  |                                   | PhSC38C04         | <i>Gonytrichum macrocladum</i>    | 186. MW11343<br>8 |
|            |                  |                                  |                   |                 |                                  |                                   | MmSC38C05         | <i>Metarhizium marquandii</i>     | 187. MW11343<br>9 |
| crop       | PISC39A01        | <i>Purpureocillium lilacinum</i> |                   |                 |                                  | 188. MW11344<br>0                 |                   |                                   |                   |
|            | PcSC39A02        | <i>Penicillium citrinum</i>      |                   |                 |                                  | 189. MW11344<br>1                 |                   |                                   |                   |
|            | CrSC39A04        | <i>Clonostachys rosea</i>        |                   |                 |                                  | 190. MW11344<br>2                 |                   |                                   |                   |
|            | orchard          | MaSC39B01                        |                   |                 |                                  | <i>Metarhizium anisopliae</i>     | 191. MW11344<br>3 |                                   |                   |
| PcSC39B02  |                  | <i>Penicillium citrinum</i>      | 192. MW11344<br>4 |                 |                                  |                                   |                   |                                   |                   |
| SC40       | Qianwei, Sichuan | E103.95,N29.17                   | crop              | PISC40A01       | <i>Purpureocillium lilacinum</i> | 193. MW11344<br>5                 |                   |                                   |                   |
|            |                  |                                  |                   | MmSC40A02       | <i>Metarhizium marquandii</i>    | 194. MW11344<br>6                 |                   |                                   |                   |
|            |                  |                                  |                   | PcSC40A03       | <i>Penicillium citrinum</i>      | 195. MW11344<br>7                 |                   |                                   |                   |
|            |                  |                                  | Grassy            | MmSC40B01       | <i>Metarhizium marquandii</i>    | 196. MW11344<br>8                 |                   |                                   |                   |
|            |                  |                                  |                   | RsSC40B02       | <i>Rhinocladiella similis</i>    | 197. MW11344<br>9                 |                   |                                   |                   |
|            |                  |                                  |                   | PISC40B03       | <i>Purpureocillium lilacinum</i> | 198. MW11345<br>0                 |                   |                                   |                   |

| Sample NO. | Sample Location   | Longitude and Latitude | Soil Vegetation | Isolate NO | Species                             | Genebank Access NO. |
|------------|-------------------|------------------------|-----------------|------------|-------------------------------------|---------------------|
| SC41       | Jingyan, Sichuan  | E104.01,N29.53         | Arable          | SC40B06    | <i>Acremonium nepalense</i>         | 199. MW113451       |
|            |                   |                        |                 | MmSC41A01  | <i>Metarhizium marquandii</i>       | 200. MW113452       |
|            |                   |                        |                 | PlSC41A02  | <i>Purpureocillium lavendulum</i>   | 201. MW113453       |
|            |                   |                        |                 | RsSC41A03  | <i>Rhinoctadiella similis</i>       | 202. MW113454       |
|            |                   |                        | crop            | PlSC41B02  | <i>Purpureocillium lilacinum</i>    | 203. MW113455       |
|            |                   |                        |                 | MmSC41C01  | <i>Metarhizium marquandii</i>       | 204. MW113456       |
|            |                   |                        | forest          | PcSC41C02  | <i>Penicillium citrinum</i>         | 205. MW113457       |
|            |                   |                        |                 | PlSC41C03  | <i>Purpureocillium lilacinum</i>    | 206. MW113458       |
| SC42       | Rongxian, Sichuan | E104.36,N29.44         | crop            | MmSC42A01  | <i>Metarhizium marquandii</i>       | 207. MW113459       |
|            |                   |                        |                 | MaSC42A02  | <i>Metarhizium anisopliae</i>       | 208. MW113460       |
|            |                   |                        |                 | PpSC42A03  | <i>Pseudogymnoascus pannorum</i>    | 209. MW113461       |
|            |                   |                        |                 | RsSC42B02  | <i>Rhinoctadiella similis</i>       | 210. MW113462       |
|            |                   |                        | Grassy          | PlSC42B03  | <i>Purpureocillium lilacinum</i>    | 211. MW113463       |
|            |                   |                        |                 | PpSC42B04  | <i>Talaromyces pinophilum</i>       | 212. MW113464       |
|            |                   |                        |                 | RsSC42C01  | <i>Rhinoctadiella similis</i>       | 213. MW113465       |
|            |                   |                        |                 | PlSC42C02  | <i>Purpureocillium lilacinum</i>    | 214. MW113466       |
|            |                   |                        | crop            | MmSC42C04  | <i>Metarhizium marquandii</i>       | 215. MW113467       |
|            |                   |                        |                 | PcSC42C05  | <i>Penicillium citrinum</i>         | 216. MW113468       |
|            |                   |                        |                 | SsSC42C06  | <i>Simplicillium subtropicum</i>    | 217. MW113469       |
|            |                   |                        |                 | MaSC42C07  | <i>Metarhizium anisopliae</i>       | 218. MW113470       |
|            |                   |                        | forest          | PhSC42C08  | <i>Gonytrichum macrocladum</i>      | 219. MW113471       |
|            |                   |                        |                 | MmSC43A01  | <i>Metarhizium marquandii</i>       | 220. MW113472       |
|            |                   |                        |                 | AtSC43A02  | <i>Aspergillus terreus</i>          | 221. MW113473       |
|            |                   |                        |                 | MaSC43A03  | <i>Metarhizium anisopliae</i>       | 222. MW113474       |
| SC43       | Weiyuan, Sichuan  | E104.62,N29.52         | forest          | PlSC43A04  | <i>Purpureocillium lilacinum</i>    | 223. MW113475       |
|            |                   |                        |                 | CcSC43A05  | <i>Cladosporium cladosporioides</i> | 224. MW113476       |
|            |                   |                        |                 | PcSC43A06  | <i>Penicillium citrinum</i>         | 225. MW113477       |
|            |                   |                        | Arable          | SC43B01    | <i>Penicillium raperi</i>           | 226. MW113478       |



| Sample NO. | Sample Location   | Longitude and Latitude | Soil Vegetation | Isolate NO | Species                             | Genebank Access NO. |
|------------|-------------------|------------------------|-----------------|------------|-------------------------------------|---------------------|
| SC44       | Renshou, Sichuan  | E104.18,N29.96         | crop            | PcSC43C01  | <i>Penicillium citrinum</i>         | 227. MW113479       |
|            |                   |                        |                 | MaSC43C03  | <i>Metarhizium anisopliae</i>       | 228. MW113480       |
|            |                   |                        | Grassy          | PlSC44A01  | <i>Purpureocillium lilacinum</i>    | 229. MW113481       |
|            |                   |                        |                 | AtSC44A02  | <i>Aspergillus terreus</i>          | 230. MW113482       |
|            |                   |                        |                 | MaSC44A03  | <i>Metarhizium anisopliae</i>       | 231. MW113483       |
|            |                   |                        |                 | PcSC44A04  | <i>Penicillium citrinum</i>         | 232. MW113484       |
|            |                   |                        |                 | MaSC44B01  | <i>Metarhizium anisopliae</i>       | 233. MW113485       |
|            |                   |                        |                 | TpSC44B02  | <i>Talaromyces pinophilum</i>       | 234. MW113486       |
|            |                   |                        |                 | PlSC44B04  | <i>Purpureocillium lilacinum</i>    | 235. MW113487       |
|            |                   |                        |                 | PhSC44B05  | <i>Gonytrichum macrocladum</i>      | 236. MW113488       |
|            |                   |                        |                 | SkSC44B08  | <i>Sarocladium kiliense</i>         | 237. MW113489       |
|            |                   |                        |                 | CrSC44B09  | <i>Clonostachys rosea</i>           | 238. MW113490       |
|            |                   |                        |                 | AtSC44B10  | <i>Aspergillus terreus</i>          | 239. MW113491       |
|            |                   |                        |                 | IjSC44B11  | <i>Isaria javanica</i>              | 240. MW113492       |
| SC45       | Shuangliu, Chendu | E104.12,N30.30         | forest          | CcSC45A01  | <i>Cladosporium cladosporioides</i> | 241. MW113493       |
|            |                   |                        |                 | PcSC45A02  | <i>Penicillium citrinum</i>         | 242. MW113494       |
|            |                   |                        |                 | PlSC45A03  | <i>Purpureocillium lilacinum</i>    | 243. MW113495       |
|            |                   |                        |                 | MmSC45A04  | <i>Metarhizium marquandii</i>       | 244. MW113496       |
|            |                   |                        |                 | SC45A05    | <i>Penicillium madriti</i>          | 245. MW113497       |
|            |                   |                        | Grassy          | AtSC45A06  | <i>Aspergillus terreus</i>          | 246. MW113498       |
|            |                   |                        |                 | AtSC45B01  | <i>Aspergillus terreus</i>          | 247. MW113499       |
|            |                   |                        |                 | MaSC45B03  | <i>Metarhizium anisopliae</i>       | 248. MW113500       |
|            |                   |                        |                 | CcSC45B04  | <i>Cladosporium cladosporioides</i> | 249. MW113501       |
|            |                   |                        |                 | PlSC45B05  | <i>Purpureocillium lavendulum</i>   | 250. MW113502       |
|            |                   |                        | crop            | IjSC45C01  | <i>Isaria javanica</i>              | 251. MW113503       |
|            |                   |                        |                 | PlSC45C03  | <i>Purpureocillium lilacinum</i>    | 252. MW113504       |
|            |                   |                        |                 | CrSC45C06  | <i>Clonostachys pityrodes</i>       | 253. MW113505       |
| SC46       | Guanghan, Sichuan | E104.32,N30.99         | Grassy          | SC46A01    | <i>Aspergillus tabacinus</i>        | 254. MW113506       |

| Sample NO. | Sample Location   | Longitude and Latitude | Soil Vegetation | Isolate NO | Species                           | Genebank Access NO. |
|------------|-------------------|------------------------|-----------------|------------|-----------------------------------|---------------------|
| SC47       | Mianyang, Sichuan | E104.87,N31.56         | crop            | SC46A02    | <i>Cephalotrichum microsporum</i> | 255. MW113507       |
|            |                   |                        |                 | MaSC46A04  | <i>Metarhizium anisopliae</i>     | 256. MW113508       |
|            |                   |                        |                 | MmSC46A06  | <i>Metarhizium marquandii</i>     | 257. MW113509       |
|            |                   |                        |                 | AnSC46A07  | <i>Acremonium nepalense</i>       | 258. MW113510       |
|            |                   |                        |                 | AtSC46A09  | <i>Aspergillus terreus</i>        | 259. MW113511       |
|            |                   |                        |                 | PlSC46A10  | <i>Purpureocillium lilacinum</i>  | 260. MW113512       |
|            |                   |                        |                 | SsSC46B02  | <i>Simplicillium subtropicum</i>  | 261. MW113513       |
|            |                   |                        |                 | CrSC46B03  | <i>Clonostachys rosea</i>         | 262. MW113514       |
|            |                   |                        |                 | MaSC46B04  | <i>Metarhizium anisopliae</i>     | 263. MW113515       |
|            |                   |                        |                 | SC46B05    | <i>Arthrospis hispanica</i>       | 264. MW113516       |
|            |                   |                        |                 | PlSC46B06  | <i>Purpureocillium lilacinum</i>  | 265. MW113517       |
|            |                   |                        |                 | MmSC46B07  | <i>Metarhizium marquandii</i>     | 266. MW113518       |
|            |                   |                        |                 | RoSC46C03  | <i>Rhizopus oryzae</i>            | 267. MW113519       |
|            |                   |                        |                 | PlSC46C04  | <i>Purpureocillium lilacinum</i>  | 268. MW113520       |
|            |                   |                        |                 | MmSC46C05  | <i>Metarhizium marquandii</i>     | 269. MW113521       |
|            |                   |                        | Grassy          | PjSC47A01  | <i>Penicillium janthinellum</i>   | 270. MW113522       |
|            |                   |                        |                 | PlSC47A02  | <i>Purpureocillium lilacinum</i>  | 271. MW113523       |
|            |                   |                        |                 | AtSC47B01  | <i>Aspergillus terreus</i>        | 272. MW113524       |
|            |                   |                        |                 | CrSC47B02  | <i>Clonostachys rosea</i>         | 273. MW113525       |
|            |                   |                        |                 | PlSC47B03  | <i>Purpureocillium lilacinum</i>  | 274. MW113526       |
|            |                   |                        |                 | PsSC47B05  | <i>Penicillium janthinellum</i>   | 275. MW113527       |
|            |                   |                        |                 | PcSC47B06  | <i>Penicillium chrysogenum</i>    | 276. MW113528       |
|            |                   |                        |                 | AfSC47B07  | <i>Aspergillus flavus</i>         | 277. MW113529       |
| SC48       | Zitong, Sichuan   | E105.20,N31.69         | forest          | PlSC48A01  | <i>Purpureocillium lilacinum</i>  | 278. MW113530       |
|            |                   |                        |                 | PcSC48A02  | <i>Penicillium citrinum</i>       | 279. MW113531       |
|            |                   |                        |                 | IjSC48A03  | <i>Isaria javanica</i>            | 280. MW113532       |
| SC49       | Jiange, Sichuan   | E105.26,N31.84         | Grassy          | SC49A01    | <i>Penicillium madriti</i>        | 281. MW113533       |
|            |                   |                        |                 | PlSC49A02  | <i>Purpureocillium lilacinum</i>  | 282. MW113534       |

| Sample NO. | Sample Location    | Longitude and Latitude | Soil Vegetation | Isolate NO | Species                           | Genebank Access NO. |
|------------|--------------------|------------------------|-----------------|------------|-----------------------------------|---------------------|
| SC50       | Jiange, Sichuan    | E105.48,N32.12         | Arable          | SsSC49A04  | <i>Simplicillium subtropicum</i>  | 283. MW113535       |
|            |                    |                        |                 | PcSC49B01  | <i>Penicillium citrinum</i>       | 284. MW113536       |
|            |                    |                        |                 | RoSC49B03  | <i>Rhizopus oryzae</i>            | 285. MW113537       |
|            |                    |                        | crop            | PlSC49B04  | <i>Purpureocillium lilacinum</i>  | 286. MW113538       |
|            |                    |                        |                 | PlSC49C02  | <i>Purpureocillium lilacinum</i>  | 287. MW113539       |
|            |                    |                        |                 | PcSC49C03  | <i>Pochonia chlamydosporia</i>    | 288. MW113540       |
|            |                    |                        | crop            | SkSC49C04  | <i>Sarocladium kiliense</i>       | 289. MW113541       |
|            |                    |                        |                 | McSC50A01  | <i>Microascus cirrosus</i>        | 290. MW113542       |
|            |                    |                        |                 | MaSC50A02  | <i>Metarhizium anisopliae</i>     | 291. MW113543       |
|            |                    |                        |                 | PlSC50A03  | <i>Purpureocillium lilacinum</i>  | 292. MW113544       |
|            |                    |                        |                 | PcSC50A04  | <i>Penicillium citrinum</i>       | 293. MW113545       |
|            |                    |                        |                 | PjSC50A05  | <i>Penicillium janthinellum</i>   | 294. MW113546       |
|            |                    |                        |                 | CrSC50A07  | <i>Clonostachys rosea</i>         | 295. MW113547       |
|            |                    |                        |                 | IjSC50B03  | <i>Isaria javanica</i>            | 296. MW113548       |
|            |                    |                        | orchard         | MmSC50C02  | <i>Purpureocillium lilacinum</i>  | 297. MW113549       |
|            |                    |                        |                 | LcSC50C03  | <i>Lecanicillium coprophilum</i>  | 298. MW113550       |
|            |                    |                        |                 | PcSC50C04  | <i>Penicillium citrinum</i>       | 299. MW113551       |
|            |                    |                        |                 | MaSC50C05  | <i>Metarhizium anisopliae</i>     | 300. MW113552       |
|            |                    |                        |                 | TpSC50C06  | <i>Talaromyces pinophilum</i>     | 301. MW113553       |
|            |                    |                        |                 | AtSC50C07  | <i>Aspergillus terreus</i>        | 302. MW113554       |
| SC51       | Guangyuan, Sichuan | E106.11,N32.69         | forest          | BbSC50C08  | <i>Beauveria bassiana</i>         | 303. MW113555       |
|            |                    |                        |                 | TpSC51A01  | <i>Talaromyces pinophilum</i>     | 304. MW113556       |
|            |                    |                        |                 | MmSC51A02  | <i>Metarhizium marquandii</i>     | 305. MW113557       |
|            |                    |                        |                 | SsSC51A03  | <i>Simplicillium subtropicum</i>  | 306. MW113558       |
|            |                    |                        |                 | PlSC51A04  | <i>Purpureocillium lilacinum</i>  | 307. MW113559       |
|            |                    |                        |                 | SC51A05    | <i>Penicillium raperi</i>         | 308. MW113560       |
|            |                    |                        |                 | AtSC51B01  | <i>Aspergillus tabacinus</i>      | 309. MW113561       |
|            |                    |                        | crop            | PlSC51B02  | <i>Purpureocillium lavendulum</i> | 310. MW113562       |

| Sample NO. | Sample Location    | Longitude and Latitude | Soil Vegetation | Isolate NO | Species                           | Genebank Access NO. |
|------------|--------------------|------------------------|-----------------|------------|-----------------------------------|---------------------|
| SC52       | Wangcang, Sichuan  | E106.40,N32.25         | orchard         | IjSC51B04  | <i>Isaria javanica</i>            | 311. MW113563       |
|            |                    |                        |                 | PjSC51B05  | <i>Penicillium janthinellum</i>   | 312. MW113564       |
|            |                    |                        |                 | MaSC51B06  | <i>Metarhizium anisopliae</i>     | 313. MW113565       |
|            |                    |                        |                 | CmSC51B07  | <i>Cephalotrichum microsporum</i> | 314. MW113566       |
|            |                    |                        |                 | SsSC51C01  | <i>Simplicillium subtropicum</i>  | 315. MW113567       |
|            |                    |                        |                 | PlSC51C02  | <i>Purpureocillium lilacinum</i>  | 316. MW113568       |
|            |                    |                        | crop            | MmSC51C03  | <i>Metarhizium marquandii</i>     | 317. MW113569       |
|            |                    |                        |                 | CrSC52A01  | <i>Clonostachys rosea</i>         | 318. MW113570       |
|            |                    |                        |                 | PlSC52B01  | <i>Purpureocillium lilacinum</i>  | 319. MW113571       |
|            |                    |                        |                 | MaSC52C01  | <i>Metarhizium anisopliae</i>     | 320. MW113572       |
|            |                    |                        |                 | AtSC52C02  | <i>Aspergillus terreus</i>        | 321. MW113573       |
|            |                    |                        |                 | IjSC52C03  | <i>Isaria javanica</i>            | 322. MW113574       |
| SC53       | Bazhong, Sichuan   | E106.79,N31.86         | crop            | PlSC52C04  | <i>Purpureocillium lilacinum</i>  | 323. MW113575       |
|            |                    |                        |                 | PpSC52C06  | <i>Talaromyces pinophilum</i>     | 324. MW113576       |
|            |                    |                        |                 | CrSC53A01  | <i>Clonostachys rosea</i>         | 325. MW113577       |
|            |                    |                        |                 | IjSC53A04  | <i>Isaria javanica</i>            | 326. MW113578       |
|            |                    |                        | Grassy          | AtSC53B01  | <i>Aspergillus terreus</i>        | 327. MW113579       |
|            |                    |                        |                 | PcSC53B02  | <i>Penicillium citrinum</i>       | 328. MW113580       |
|            |                    |                        |                 | IjSC53B05  | <i>Isaria javanica</i>            | 329. MW113581       |
|            |                    |                        | Arable          | IjSC53C02  | <i>Isaria javanica</i>            | 330. MW113582       |
|            |                    |                        |                 | PlSC53C03  | <i>Purpureocillium lilacinum</i>  | 331. MW113583       |
|            |                    |                        |                 | PpSC53C06  | <i>Talaromyces pinophilum</i>     | 332. MW113584       |
|            |                    |                        |                 | PbSC53C07  | <i>Penicillium brevicompactum</i> | 333. MW113585       |
|            |                    |                        |                 | AtSC53C08  | <i>Aspergillus terreus</i>        | 334. MW113586       |
| SC54       | Pingchang, Sichuan | E107.04,N31.68         | forest          | IfSC54A03  | <i>Isaria javanica</i>            | 335. MW113587       |
|            |                    |                        |                 | SsSC54A04  | <i>Simplicillium subtropicum</i>  | 336. MW113588       |
|            |                    |                        |                 | PcSC54A05  | <i>Penicillium citrinum</i>       | 337. MW113589       |
|            |                    |                        |                 | AtSC54A06  | <i>Aspergillus terreus</i>        | 338. MW113590       |

| Sample NO. | Sample Location   | Longitude and Latitude | Soil Vegetation | Isolate NO                    | Species                             | Genebank Access NO.              |
|------------|-------------------|------------------------|-----------------|-------------------------------|-------------------------------------|----------------------------------|
| SC55       | Dazhou, Sichuan   | E107.48,N31.13         | crop            | TpSC54B01                     | <i>Talaromyces pinophilum</i>       | 339. MW113591                    |
|            |                   |                        |                 | PlSC54B02                     | <i>Purpureocillium lilacinum</i>    | 340. MW113592                    |
|            |                   |                        |                 | SsSC54B04                     | <i>Simplicillium subtropicum</i>    | 341. MW113593                    |
|            |                   |                        |                 | MmSC54B05                     | <i>Metarhizium marquandii</i>       | 342. MW113594                    |
|            |                   |                        |                 | PcSC54B06                     | <i>Penicillium citrinum</i>         | 343. MW113595                    |
|            |                   |                        | crop            | SsSC55A01                     | <i>Simplicillium subtropicum</i>    | 344. MW113596                    |
|            |                   |                        |                 | Arable                        | SkSC55B01                           | <i>Sarocladium kiliense</i>      |
|            |                   |                        | PlSC55B02       |                               | <i>Purpureocillium lavendulum</i>   | 346. MW113598                    |
|            |                   |                        | CcSC55B06       |                               | <i>Cladosporium cladosporioides</i> | 347. MW113599                    |
|            |                   |                        | PpSC55B07       | <i>Talaromyces pinophilum</i> | 348. MW113600                       |                                  |
|            |                   |                        |                 | SC55B08                       | <i>Penicillium raperi</i>           | 349. MW113601                    |
|            |                   |                        | Grassy          | PlSC55C01                     | <i>Purpureocillium lilacinum</i>    | 350. MW113602                    |
|            |                   |                        |                 | MaSC55C02                     | <i>Metarhizium anisopliae</i>       | 351. MW113603                    |
|            |                   |                        |                 | ChSC55C04                     | <i>Cladosporium halotolerans</i>    | 352. MW113604                    |
|            |                   |                        |                 | SC55C05                       | <i>Penicillium madriti</i>          | 353. MW113605                    |
|            |                   |                        |                 | AtSC55C07                     | <i>Aspergillus terreus</i>          | 354. MW113606                    |
| SC56       | Dazhou, Sichuan   | E107.27,N30.78         | Grassy          | PjSC56A03                     | <i>Penicillium janthinellum</i>     | 355. MW113607                    |
|            |                   |                        |                 | crop                          | PpSC56B01                           | <i>Pseudogymnoascus pannorum</i> |
|            |                   |                        | PcSC56B04       |                               | <i>Penicillium janthinellum</i>     | 357. MW113609                    |
| SC57       | Guang'an, Sichuan | E106.72,N30.29         | Grassy          | PlSC57A01                     | <i>Purpureocillium lilacinum</i>    | 358. MW113610                    |
|            |                   |                        |                 | PpSC57A03                     | <i>Pseudogymnoascus pannorum</i>    | 359. MW113611                    |
|            |                   |                        |                 | RsSC57A04                     | <i>Rhinoctadiella similis</i>       | 360. MW113612                    |
|            |                   |                        |                 | TpSC57A05                     | <i>Talaromyces purpureogenus</i>    | 361. MW113613                    |
|            |                   |                        |                 | PhSC57A06                     | <i>Gonytrichum macrocladum</i>      | 362. MW113614                    |
|            |                   |                        |                 | crop                          | SC57A08                             | <i>Penicillium raperi</i>        |
|            |                   |                        | MmSC57A09       |                               | <i>Metarhizium marquandii</i>       | 364. MW113616                    |
|            |                   |                        | PcSC57A12       |                               | <i>Penicillium citrinum</i>         | 365. MW113617                    |
|            |                   |                        | Arable          | PpSC57B01                     | <i>Talaromyces pinophilum</i>       | 366. MW113618                    |

| Sample NO. | Sample Location   | Longitude and Latitude | Soil Vegetation | Isolate NO | Species                             | Genebank Access NO. |
|------------|-------------------|------------------------|-----------------|------------|-------------------------------------|---------------------|
| SC58       | Nanchong, Sichuan | E106.34,N30.79         | Grassy          | PlSC57B02  | <i>Purpureocillium lilacinum</i>    | 367. MW113619       |
|            |                   |                        |                 | AtSC57B03  | <i>Aspergillus terreus</i>          | 368. MW113620       |
|            |                   |                        |                 | AfSC57C01  | <i>Aspergillus fumigatus</i>        | 369. MW113621       |
|            |                   |                        |                 | SsSC57C03  | <i>Simplicillium subtropicum</i>    | 370. MW113622       |
|            |                   |                        |                 | PlSC58A01  | <i>Purpureocillium lilacinum</i>    | 371. MW113623       |
|            |                   |                        |                 | PcSC58A02  | <i>Penicillium citrinum</i>         | 372. MW113624       |
|            |                   |                        | crop            | SsSC58A03  | <i>Simplicillium subtropicum</i>    | 373. MW113625       |
|            |                   |                        |                 | AtSC58A04  | <i>Aspergillus terreus</i>          | 374. MW113626       |
|            |                   |                        |                 | PpSC58B01  | <i>Pseudogymnoascus pannorum</i>    | 375. MW113627       |
|            |                   |                        |                 | PlSC58B02  | <i>Purpureocillium lilacinum</i>    | 376. MW113628       |
|            |                   |                        |                 | SC58B03    | <i>Penicillium raperi</i>           | 377. MW113629       |
|            |                   |                        |                 | AtSC58B07  | <i>Aspergillus terreus</i>          | 378. MW113630       |
| SC59       | Nanchong, Sichuan | E106.15,N30.64         | orchard         | PcSC59A01  | <i>Penicillium citrinum</i>         | 379. MW113631       |
|            |                   |                        |                 | PlSC59A02  | <i>Purpureocillium lilacinum</i>    | 380. MW113632       |
|            |                   |                        | forest          | PlSC59B01  | <i>Purpureocillium lilacinum</i>    | 381. MW113633       |
|            |                   |                        |                 | AtSC59B02  | <i>Aspergillus terreus</i>          | 382. MW113634       |
| SC60       | Pengxi, Sichuan   | E105.97,N30.43         | crop            | CcSC60A01  | <i>Cladosporium cladosporioides</i> | 383. MW113635       |
|            |                   |                        |                 | PbSC60A03  | <i>Penicillium brevicompactum</i>   | 384. MW113636       |
|            |                   |                        |                 | CrSC60B01  | <i>Clonostachys rosea</i>           | 385. MW113637       |
|            |                   |                        | Grassy          | MmSC60B03  | <i>Metarhizium marquandii</i>       | 386. MW113638       |
|            |                   |                        |                 | PpSC60C02  | <i>Talaromyces pinophilum</i>       | 387. MW113639       |
| SC61       | Suining, Sichuan  | E105.50,N30.44         | crop            | PlSC60C05  | <i>Purpureocillium lilacinum</i>    | 388. MW113640       |
|            |                   |                        |                 | CrSC61A01  | <i>Clonostachys rosea</i>           | 389. MW113641       |
|            |                   |                        |                 | PlSC61A02  | <i>Purpureocillium lilacinum</i>    | 390. MW113642       |
|            |                   |                        |                 | PpSC61B01  | <i>Talaromyces pinophilum</i>       | 391. MW113643       |
|            |                   |                        |                 | RsSC61B02  | <i>Rhinochlamydia similis</i>       | 392. MW113644       |
|            |                   |                        |                 | PlSC61B03  | <i>Purpureocillium lilacinum</i>    | 393. MW113645       |
|            |                   |                        |                 | MaSC61B05  | <i>Metarhizium anisopliae</i>       | 394. MW113646       |

| Sample NO. | Sample Location   | Longitude and Latitude | Soil Vegetation | Isolate NO | Species                          | Genebank Access NO. |
|------------|-------------------|------------------------|-----------------|------------|----------------------------------|---------------------|
| SC62       | Lezhi, Sichuan    | E105.17,N30.32         | Grassy          | PlSC61C01  | <i>Purpureocillium lilacinum</i> | 395. MW113647       |
|            |                   |                        |                 | MmSC61C02  | <i>Metarhizium marquandii</i>    | 396. MW113648       |
|            |                   |                        | crop            | AtSC62A01  | <i>Aspergillus terreus</i>       | 397. MW113649       |
|            |                   |                        |                 | IfSC62A03  | <i>Isaria javanica</i>           | 398. MW113650       |
|            |                   |                        |                 | MmSC62A05  | <i>Metarhizium marquandii</i>    | 399. MW113651       |
|            |                   |                        |                 | PlSC62A06  | <i>Purpureocillium lilacinum</i> | 400. MW113652       |
|            |                   |                        |                 | PlSC62B01  | <i>Purpureocillium lilacinum</i> | 401. MW113653       |
|            |                   |                        |                 | MaSC62B04  | <i>Metarhizium anisopliae</i>    | 402. MW113654       |
|            |                   |                        |                 | AtSC62B05  | <i>Aspergillus terreus</i>       | 403. MW113655       |
|            |                   |                        |                 | Grassy     | PlSC62C01                        | 404. MW113656       |
|            |                   |                        |                 |            | PcSC62C02                        | 405. MW113657       |
|            |                   |                        |                 |            | MmSC62C03                        | 406. MW113658       |
|            |                   |                        |                 |            | PmSC62C04                        | 407. MW113659       |
|            |                   |                        |                 |            | PpSC62C05                        | 408. MW113660       |
| SC63       | Jianyang, Sichuan | E104.81,N30.30         | crop            | MmSC63A01  | <i>Metarhizium marquandii</i>    | 409. MW113661       |
|            |                   |                        |                 | TtSC63A02  | <i>Talaromyces trachyspermus</i> | 410. MW113662       |
|            |                   |                        |                 | PlSC63B01  | <i>Purpureocillium lilacinum</i> | 411. MW113663       |
|            |                   |                        |                 | Grassy     | SC63C01                          | 412. MW113664       |
|            |                   |                        |                 |            | MmSC63C02                        | 413. MW113665       |
|            |                   |                        |                 | RsSC63C03  | <i>Rhinocladiella similis</i>    | 414. MW113666       |
| YN01       | Jinghong, Yunnan  | E100.89,N22.03         | forest          | PcYN0101   | <i>Penicillium citrinum</i>      | 415. MH483736       |
|            |                   |                        |                 | PIYN0102   | <i>Purpureocillium lilacinum</i> | 416. MH483737       |
|            |                   |                        | orchard         | BbYN0103   | <i>Beauveria bassiana</i>        | 417. MH483738       |
| YN02       | Jinghong, Yunnan  | E101.06,N22.45         | forest          | BbYN0201   | <i>Beauveria bassiana</i>        | 418. MH483739       |
|            |                   |                        |                 | P.YN0202   | <i>Metarhizium aciculare</i>     | 419. MH483740       |
|            |                   |                        | orchard         | PIYN0203   | <i>Purpureocillium lilacinum</i> | 420. MH483741       |
|            |                   |                        |                 | MaYN0204   | <i>Metarhizium anisopliae</i>    | 421. MH483742       |
|            |                   |                        |                 |            |                                  |                     |
| YN03       | Simao, Yunnan     | E101.01,N22.6          | crop            | PIYN0301   | <i>Purpureocillium lilacinum</i> | 422. MH483743       |

| Sample NO. | Sample Location     | Longitude and Latitude | Soil Vegetation | Isolate NO | Species                           | Genebank Access NO. |
|------------|---------------------|------------------------|-----------------|------------|-----------------------------------|---------------------|
| YN04       | Dali, Yunnan        | E100.27,N25.71         | crop            | PIYN0401   | <i>Purpureocillium lilacinum</i>  | 423. MH483744       |
|            |                     |                        |                 | PIYN0402   | <i>Purpureocillium lavendulum</i> | 424. MH483745       |
|            |                     |                        | Arable          | A.YN0403   | <i>Gliomastix roseogrisea</i>     | 425. MH483768       |
| YN59       | Shizong, Yunnan     | E104.24,N24.74         | forest          | PIYN5901   | <i>Purpureocillium lavendulum</i> | 426. MH483746       |
| YN60       | Qiubei, Yunnan      | E104.16,N24.12         | forest          |            |                                   | 427.                |
| YN61       | Guangnan, Yunnan    | E104.79,N23.75         | Grassy          |            |                                   | 428.                |
| YN62       | Shizong, Yunnan     | E104.33,N24.55         | forest          |            |                                   | 429.                |
| YN63       | Guangnan, Yunnan    | E105.06,N24.3          | orchard         |            |                                   | 430.                |
| YN64       | Yanshan, Yunnan     | E104.34,N23.67         | forest          |            |                                   | 431.                |
| YN65       | Kaiyuan, Yunnan     | E103.28,N23.86         | crop            |            |                                   | 432.                |
| YN66       | Gejiu, Yunnan       | E103.2,N23.55          | forest          | PIYN6601   | <i>Purpureocillium lavendulum</i> | 433. MH483747       |
| YN67       | Shiping, Yunnan     | E102.65,N23.66         | Grassy          | PIYN6701   | <i>Purpureocillium lavendulum</i> | 434. MH483748       |
| YN68       | Yuanjiang, Yunnan   | E101.87,N23.66         | Arable          |            |                                   | 435.                |
| YN69       | Mojiang, Yunnan     | E101.61,N23.41         | crop            |            |                                   | 436.                |
| YN70       | Ninger, Yunnan      | E101.14,N23.19         | crop            | PIYN7001   | <i>Purpureocillium lilacinum</i>  | 437. MH483749       |
|            |                     |                        |                 | IfYN7003   | <i>Isaria javanica</i>            | 438. MH483750       |
| YN71       | Ninger, Yunnan      | E101.03,N23.1          | crop            |            |                                   | 439.                |
| YN72       | Jinggu, Yunnan      | E100.92,N23.28         | forest          |            |                                   | 440.                |
| YN73       | Jinggu, Yunnan      | E100.65,N23.5          | forest          |            |                                   | 441.                |
| YN74       | Jinggu, Yunnan      | E100.47,N23.57         | crop            | PcYN7401   | <i>Metarhizium aciculare</i>      | 442. MH483751       |
|            |                     |                        |                 | PIYN7402   | <i>Purpureocillium lilacinum</i>  | 443. MH483752       |
| YN75       | Shuangjiang, Yunnan | E100.15,N23.52         | orchard         | PcYN7501   | <i>Metarhizium aciculare</i>      | 444. MH483753       |
| YN76       | Yunxian, Yunnan     | E100.01,N24.18         | crop            | PIYN7601   | <i>Purpureocillium lavendulum</i> | 445. MH483754       |
| YN77       | Yongde, Yunnan      | E99.61,N23.94          | crop            | PcYN7701   | <i>Metarhizium aciculare</i>      | 446. MH483755       |
|            |                     |                        |                 | PIYN7703   | <i>Purpureocillium lilacinum</i>  | 447. MH483756       |
| YN78       | Yongde, Yunnan      | E99.43,N24.12          | forest          | PcYN7801   | <i>Metarhizium aciculare</i>      | 448. MH483757       |
| YN79       | Yongde, Yunnan      | E99.34,N24.39          | forest          | PIYN7901   | <i>Purpureocillium lavendulum</i> | 449. MH483758       |
| YN80       | Shidian, Yunnan     | E99.19,N24.67          | crop            | PcYN8001   | <i>Metarhizium aciculare</i>      | 450. MH483759       |
|            |                     |                        |                 | PIYN8002   | <i>Purpureocillium lilacinum</i>  | 451. MH483760       |
| YN81       | Longling, Yunnan    | E98.87,N24.79          | forest          | PcYN8101   | <i>Metarhizium aciculare</i>      | 452. MH483761       |



| Sample NO. | Sample Location     | Longitude and Latitude | Soil Vegetation | Isolate NO | Species                           | Genebank Access NO. |
|------------|---------------------|------------------------|-----------------|------------|-----------------------------------|---------------------|
|            |                     |                        |                 | PIYN8102   | <i>Purpureocillium lilacinum</i>  | 453. MH48376<br>2   |
| YN82       | Longling, Yunnan    | E98.77,N24.83          | orchard         | PIYN8202   | <i>Purpureocillium lilacinum</i>  | 454. MH48376<br>3   |
| YN83       | Tengchong, Yunnan   | E98.58,N24.94          | forest          |            |                                   | 455.                |
|            |                     |                        |                 | PmYN8303   | <i>Metarhizium marquandii</i>     | 456. MH48376<br>4   |
|            |                     |                        | Arable          | MaYN8304   | <i>Metarhizium anisopliae</i>     | 457. MH48376<br>5   |
|            |                     |                        |                 | MfYN8305   | <i>Metarhizium flavoviride</i>    | 458. MH48376<br>6   |
| YN84       | Longyang, Yunnan    | E99.2,N25.31           | forest          | PIYN8401   | <i>Purpureocillium lavendulum</i> | 459. MH48376<br>7   |
| YN85       | Yangbi, Yunnan      | E99.86,N25.46          | crop            |            |                                   | 460.                |
| YN86       | Zunzhuang, Yunnan   | E100.32,N25.7          | crop            |            |                                   | 461.                |
| YN87       | Eryuan, Yunnan      | E99.99,N26.1           | crop            | BbYN8702   | <i>Beauveria bassiana</i>         | 462.                |
| YN88       | Xiangyun, Yunnan    | E100.88,N25.38         | crop            | PIYN8801   | <i>Purpureocillium lavendulum</i> | 463. MH48377<br>0   |
| YN89       | Lufeng, Yunnan      | E102.11,N24.94         | forest          |            |                                   | 464.                |
| YN90       | Malong, Yunnan      | E103.32,N25.37         | crop            | PIYN9001   | <i>Purpureocillium lavendulum</i> | 465. MH48377<br>1   |
| GZ34       | Dushan, Guizhou     | E107.44,N25.35         | Grassy          |            |                                   | 466.                |
| GZ35       | Dushan, Guizhou     | E107.57,N25.85         | Grassy          | PIGZ3501   | <i>Purpureocillium lavendulum</i> | 467. MH48377<br>2   |
|            |                     |                        |                 | P.GZ3502   | <i>Purpureocillium lavendulum</i> | 468. MH48377<br>3   |
|            |                     |                        | Arable          | MaGZ3503   | <i>Metarhizium anisopliae</i>     | 469. MH48377<br>4   |
| GZ36       | Duyun, Guizhou      | E107.5,N26.21          | Grassy          |            |                                   | 470.                |
| GZ37       | Fuquan, Guizhou     | E107.53,N26.7          | Grassy          | MaGZ3701   | <i>Metarhizium anisopliae</i>     | 471. MH48377<br>5   |
|            |                     |                        |                 | PIGZ3702   | <i>Purpureocillium lilacinum</i>  | 472. MH48377<br>6   |
|            |                     |                        | Arable          | IfGZ3703   | <i>Isaria fumosorosea</i>         | 473. MH48377<br>7   |
|            |                     |                        | orchard         | PsGZ3704   | <i>Paecilomyces sp.</i>           | 474.                |
| GZ38       | Weng'an, Guizhou    | E107.41,N27.1          | Grassy          |            |                                   | 475.                |
| GZ39       | Kaiyang, Guizhou    | E107.08,N26.9          | forest          | PsGZ3901   | <i>Paecilomyces sp.</i>           | 476.                |
| GZ40       | Qingzhen, Guizhou   | E106.44,N26.74         | forest          |            |                                   | 477.                |
|            |                     |                        |                 | L.GZ4002   | <i>Lecanicillium coprophilum</i>  | 478. MH48378<br>0   |
| GZ41       | Dafang, Guizhou     | E105.77,N27.12         | forest          | MaGZ4101   | <i>Metarhizium anisopliae</i>     | 479. MH48378<br>1   |
| GZ42       | Qixingguan, Guizhou | E105.31,N27.25         | Grassy          | PsGZ4201   | <i>Paecilomyces sp.</i>           | 480.                |
|            |                     |                        |                 | PmGZ4202   | <i>Metarhizium marquandii</i>     | 481. MH48378<br>3   |

| Sample NO.    | Sample Location   | Longitude and Latitude            | Soil Vegetation | Isolate NO | Species                           | Genebank Access NO.            |                |
|---------------|-------------------|-----------------------------------|-----------------|------------|-----------------------------------|--------------------------------|----------------|
| GZ43          | Dafang, Guizhou   | E105.82,N27.27                    | orchard         | PsGZ4203   | <i>Purpureocillium sp.</i>        | 482.                           |                |
|               |                   |                                   |                 | MfGZ4204   | <i>Metarhizium flavoviride</i>    | 483. MH483785                  |                |
|               |                   |                                   |                 | MaGZ4205   | <i>Metarhizium anisopliae</i>     | 484. MH483786                  |                |
|               |                   |                                   |                 | IfGZ4206   | <i>Isaria fumosorosea</i>         | 485. MH483787                  |                |
|               |                   |                                   | Arable          | MaGZ4207   | <i>Metarhizium anisopliae</i>     | 486. MH483788                  |                |
|               |                   |                                   |                 | PmGZ4301   | <i>Metarhizium marquandii</i>     | 487. MH483789                  |                |
|               |                   |                                   |                 | MaGZ4302   | <i>Metarhizium anisopliae</i>     | 488. MH483790                  |                |
|               |                   |                                   | forest          | IfGZ4304   | <i>Isaria fumosorosea</i>         | 489. MH483791                  |                |
|               |                   |                                   |                 | MfGZ4305   | <i>Metarhizium flavoviride</i>    | 490. MH483792                  |                |
|               |                   |                                   |                 | PsGZ4306   | <i>Paecilomyces sp.</i>           | 491.                           |                |
| GZ44          | Bozhou, Guizhou   | E106.37,N27.52                    | orchard         | PIGZ4402   | <i>Purpureocillium lavendulum</i> | 492. MH483794                  |                |
|               |                   |                                   |                 | PmGZ4403   | <i>Metarhizium marquandii</i>     | 493. MH483795                  |                |
|               |                   |                                   | forest          | PIGZ4404   | <i>Purpureocillium lavendulum</i> | 494. MH483796                  |                |
|               |                   |                                   |                 | crop       | MfGZ4501                          | <i>Metarhizium flavoviride</i> | 495.           |
| GZ46          | Bozhou, Guizhou   | E106.66,N27.59                    | Grassy          |            | MaGZ4503                          | <i>Metarhizium anisopliae</i>  | 496.           |
|               |                   |                                   |                 | IfGZ4601   | <i>Isaria javanica</i>            | 497. MH483800                  |                |
| GZ47          | Bozhou, Guizhou   | E107.15,N27.66                    | Grassy          | L.GZ4702   | <i>Lecanicillium coprophilum</i>  | 498. MH483801                  |                |
|               |                   |                                   |                 |            |                                   | 499. MH483802                  |                |
|               |                   |                                   |                 | Arable     | MaGZ4606                          | <i>Metarhizium anisopliae</i>  | 500. MH483803  |
|               |                   |                                   |                 |            | GZ48                              | Meitan, Guizhou                | E107.52,N27.75 |
| 502. MH483805 |                   |                                   |                 |            |                                   |                                |                |
| GZ49          | Yuqing, Guizhou   | E107.91,N27.25                    | orchard         | PIGZ4902   | <i>Purpureocillium lavendulum</i> | 503. MH483806                  |                |
|               |                   |                                   |                 | PsGZ4903   | <i>Purpureocillium sp.</i>        | 504.                           |                |
|               |                   |                                   |                 | L.GZ4904   | <i>Lecanicillium coprophilum</i>  | 505. MH483808                  |                |
|               |                   |                                   | forest          | MaGZ4905   | <i>Metarhizium anisopliae</i>     | 506.                           |                |
|               |                   |                                   |                 | GZ50       | Zhenyuan, Guizhou                 | E108.23,N27.35                 | forest         |
| orchard       | BbGZ5002          | <i>Beauveria bassiana</i>         | 508.            |            |                                   |                                |                |
|               | PIGZ5004          | <i>Purpureocillium lavendulum</i> | 509. MH483813   |            |                                   |                                |                |
| GZ51          | Zhenyuan, Guizhou | E108.39,N27.04                    | Grassy          |            |                                   | 510.                           |                |
| GZ52          | Shiqian, Guizhou  | E108.22,N27.49                    | Arable          | MaGZ5201   | <i>Metarhizium anisopliae</i>     | 511. MH483814                  |                |

| Sample NO. | Sample Location   | Longitude and Latitude | Soil Vegetation | Isolate NO | Species                           | Genebank Access NO. |
|------------|-------------------|------------------------|-----------------|------------|-----------------------------------|---------------------|
|            |                   |                        |                 | PlGZ5202   | <i>Purpureocillium lilacinum</i>  | 512. MH483815       |
|            |                   |                        | crop            | PmGZ5203   | <i>Metarhizium marquandii</i>     | 513. MH483816       |
| GZ53       | Sinan, Guizhou    | E108.23,N27.73         | Arable          | L.GZ5303   | <i>Lecanicillium coprophilum</i>  | 514.                |
| GZ54       | Sinan, Guizhou    | E108.23,N27.94         | Arable          |            |                                   | 515.                |
| GZ55       | Dejiang, Guizhou  | E108.16,N28.34         | Grassy          | L.GZ5503   | <i>Lecanicillium coprophilum</i>  | 516. MH483817       |
| GZ56       | Jiangkou, Guizhou | E108.57,N27.82         | Grassy          | L.GZ5601   | <i>Lecanicillium coprophilum</i>  | 517. MH483818       |
| GZ57       | Jiangkou, Guizhou | E108.94,N27.72         | Grassy          | PmGZ5701   | <i>Metarhizium marquandii</i>     | 518. MH483819       |
|            |                   |                        |                 | L.GZ5702   | <i>Lecanicillium coprophilum</i>  | 519. MH483820       |
|            |                   |                        | Arable          | MaGZ5705   | <i>Metarhizium anisopliae</i>     | 520. MH483821       |
|            |                   |                        | crop            | CsGZ5706   | <i>Cladosporium halotolerans</i>  | 521. MH483822       |
| GZ58       | Xingyi, Guizhou   | E104.95,N25.13         | crop            | PsGZ5801   | <i>Purpureocillium sp.</i>        | 522.                |
| GZ59       | Xingyi, Guizhou   | E105.03,N24.95         | forest          |            |                                   | 523.                |
| GZ60       | Bijiang, Guizhou  | E109.2,N27.76          | Grassy          |            |                                   | 524.                |
| GZ91       | Panzhou, Guizhou  | E104.33,N25.65         | forest          |            |                                   | 525.                |
| GZ92       | Pu'an, Guizhou    | E105.01,N25.75         | crop            |            |                                   | 526.                |
| GZ93       | Guanling, Guizhou | E105.65,N25.98         | crop            |            |                                   | 527.                |
| GZ94       | Zhenning, Guizhou | E105.68,N26.02         | forest          |            |                                   | 528.                |
| GZ95       | Xingyi, Guizhou   | E104.93,N25.03         | forest          |            |                                   | 529.                |
| GZ96       | Xixiu, Guizhou    | E105.87,N26.21         | forest          | PlGZ9601   | <i>Purpureocillium lavendulum</i> | 530. MH483824       |
| GZ97       | Leishan, Guizhou  | E108.18,N26.5          | forest          |            |                                   |                     |
